# Supplementary material for: M2 Receptor Activation Counteracts the Glioblastoma Cancer Stem Cell Response to Hypoxia Condition
Source: Int J Mol Sci. 2020 Mar 2;21(5):1700. doi: 10.3390/ijms21051700 (PMC7084794; doi:10.3390/ijms21051700)
Supplement: Supplementary file 1 [file ijms-21-01700-s001.pdf]

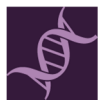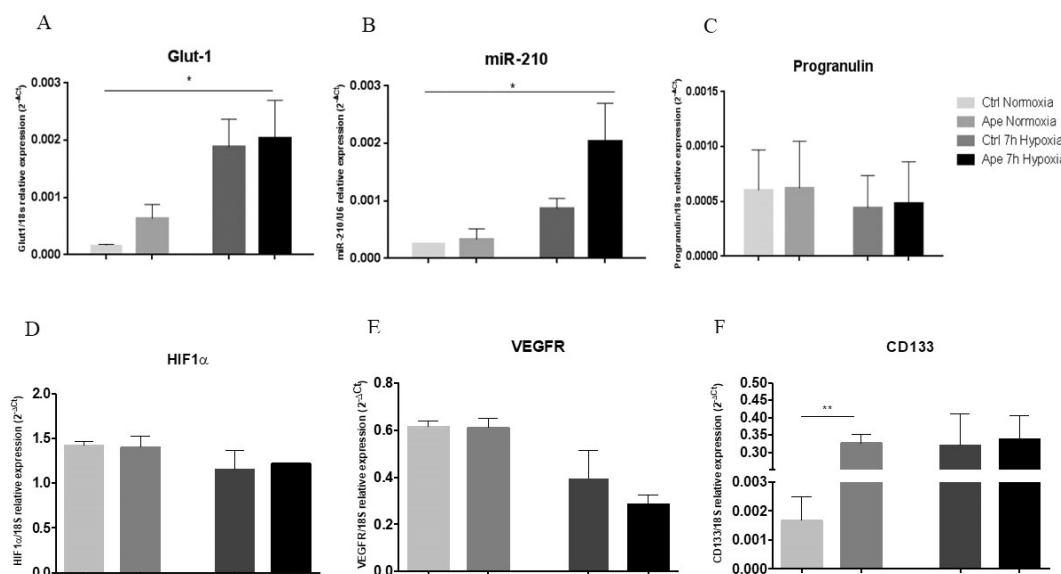

**Supplementary Fig. S1.** qRT-PCR analysis for Glut-1 (A), miR-210 (B), Progranulin (C), HIF1 $\alpha$  (D), VEGFR (E) and CD133 (F) expression following 7h of hypoxia, in absence and presence of 100  $\mu$ M Ape. The data are the mean $\pm$ SEM of the three independent experiments performed in duplicate (ANOVA test, \*  $p < 0.05$ ; t-test, \*\*  $p < 0.01$ ).

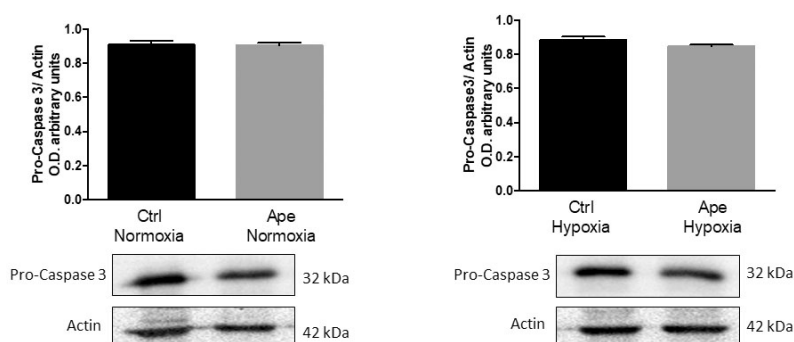

**Supplementary Fig. S2.** Western blotting analysis for pro-caspase 3 expression in GB7 cells in normoxia and 48h hypoxia, in absence or presence of 100  $\mu$ M Ape (48h). The graph shows the densitometric analysis of the bands obtained after normalization with the  $\beta$ -actin as reference protein. The data are the mean $\pm$ SEM of the three independent experiments.
